# Supplementary material
Source: publisher site journal article supplement (https://www.dovepress.com/get_supplementary_file.php?f=363952.docx)
Supplement: Supplementary file 1 [file get_supplementary_file.php]

Supplementary material

ORIGINAL RESEARCH

Igaz et al

**Functionalized mesoporous silica nanoparticles for drug-delivery to multidrug-resistant cancer cells**

Nóra Igaz1

Péter Bélteky2

Dávid Kovács1,3

Csaba Papp4

Andrea Rónavári2

Diána Szabó5

Attila Gácser4

Zoltán Kónya2;6*

Mónika Kiricsi1*

1Department of Biochemistry and Molecular Biology, University of Szeged, Szeged, Hungary; 2Department of Applied and Environmental Chemistry, University of Szeged, Szeged, Hungary;

3Institut de Pharmacologie Moléculaire et Cellulaire, Université Côte d'Azur, Inserm, CNRS, Valbonne, France;

4HCEMM-USZ Fungal Pathogens Research Group, Department of Microbiology, University of Szeged, Szeged, Hungary;

5Department of Oto-Rhino-Laryngology and Head & Neck Surgery, Szeged, Hungary;

6Eötvös Loránd Research Network, Reaction Kinetics and Surface Chemistry Research Group, Szeged, Hungary

*Corresponding authors:

Mónika Kiricsi, PhD, Department of Biochemistry and Molecular Biology, University of Szeged, Közép fasor 52. H-6726, Szeged, Hungary. Phone number: +36 (62) 544-887 E-mail: [kiricsim@bio.u-szeged.hu](mailto:kiricsim@bio.u-szeged.hu)

Zoltán Kónya, PhD, DSc, Department of Applied and Environmental Chemistry, University of Szeged, Rerrich square 1. H-6720 Szeged, Hungary

Phone number: +36 (62) 544620 E-mail: [konya@chem.u-szeged.hu](mailto:konya@chem.u-szeged.hu)


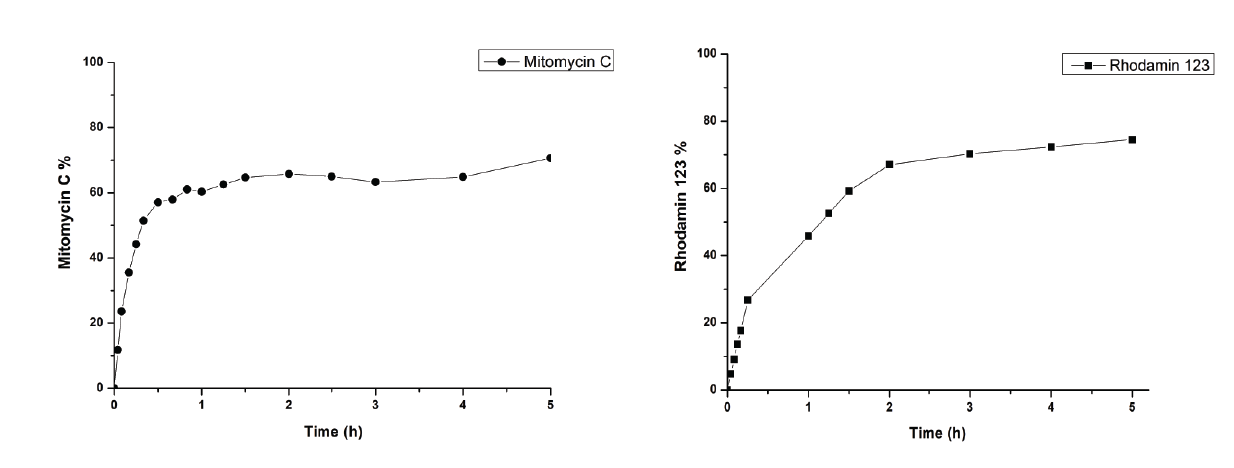


**Supplementary File.** *In vitro* drug release profiles of RhoB@MMC@MSNs and RhoB@Rho123@MSNs.
